# Supplementary material for: New ionic liquids based on the complexation of dipropyl sulfide and AlCl3for electrodeposition of aluminum
Source: Royal Society of Chemistry journal article supplement (doi:10.1039/c5cc05233e), 2015-01-01
Supplement: c5cc05233e1.pdf [file c5cc05233e1.pdf]

## Electronic Supplementary Information (ESI)

### New ionic liquids based on complexation of dipropylsulfide and $\text{AlCl}_3$ for electrodeposition of aluminum

Youxing Fang, Xueguang Jiang, Xiao-guang Sun\*<sup>a</sup> and Sheng Dai\*<sup>ab</sup>

#### Materials and experiments

Granular  $\text{AlCl}_3$  was purchased from Sigma-Aldrich and used as received. Dipropyl sulfide (DPS) was obtained from TCI chemical company. In Ar-filled glovebox, a desirable amount of  $\text{AlCl}_3$  is added into DPS in a sealed vessel with a magnetic stirring bar. The reaction is slightly exothermic so it is not necessary to heat the vessel to accelerate the dissolution of  $\text{AlCl}_3$ .

The differential scanning calorimetry (DSC) profile was acquired from NETZSCH (STA 409 PC) under argon environment. The mass spectrum analyses were performed using a JEOL AccuTOF-D time-of-flight (TOF) mass spectrometer with a DART (direct analysis in real time) ionization source from JEOL USA, Inc. **Fourier transform infrared data were gathered from Perkin-Elmer Fourier-transform infrared frontier spectrophotometer.** The electrochemical experiment was performed on CHI600D electrochemical analyzer. SEM images are obtained by Hitachi S-4800 FEG scanning electron microscope with the EDS attachment.

For cyclic voltammetry, a clean platinum electrode (0.5 mm in diameter) was used as working electrode, with Al sheet and Al wire as the counter and reference electrode. For electrochemical plating, a polished and cleaned Cu strip was used as cathode with Al plate as the anode. The plating bath was held on a hot plate with temperature control and stirring.

#### Supplementary figure

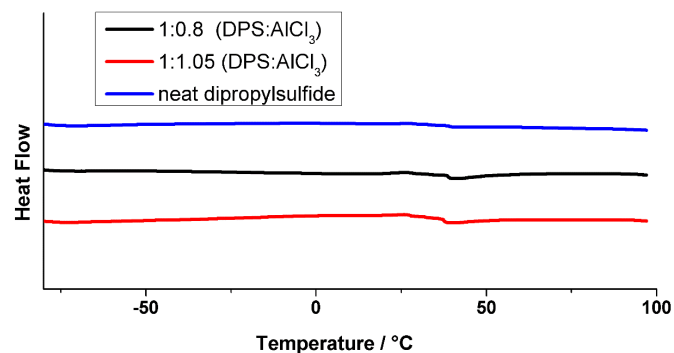

Figure S1 DSC thermograms of the ionic liquids with different ratios of DPS/ $\text{AlCl}_3$  at

a heating rate of 10 °C /min under nitrogen. (Note: the lines have been shifted perpendicularly for clarity).
